# Supplementary material for: Flexible and rapid validation of structural variation using adaptive sampling
Source: Research Square preprint supplement (doi:10.21203/rs.3.rs-7307341/v1), 2025-09-11
Supplement: Supplementary file [file 28c0da4a463e0656b940648e.pdf]

## Supplementary Files

**Supplementary Table 1.**

| Sample  | Sex | Platform | Rearrange-<br>ment region<br>(Table 1) | Rearrangement                                                                                   | Pass<br>bases<br>(Gb) | Target<br>regions<br>included | Copy number<br>change<br>detected | Breakpoint<br>junction reads<br>identified |
|---------|-----|----------|----------------------------------------|-------------------------------------------------------------------------------------------------|-----------------------|-------------------------------|-----------------------------------|--------------------------------------------|
| S1      | F   | MinION   | A                                      | chrXp21.1<br>Dup-Nml-Dup                                                                        | 14.3                  | A - G                         | Yes                               | Yes                                        |
| S2      | M   | MinION   | B                                      | Chr14q11.2<br>Dup-Nml-Dup                                                                       | 14.6                  | A - L                         | Yes                               | Yes                                        |
| S3      | M   | MinION   | C                                      | Chr16p13.3<br>Trip-Quint-Trip                                                                   | 17.0                  | A - G                         | Yes                               | Yes                                        |
| S4      | M   | MinION   | C                                      | Chr16p13.3<br>Trip-Quint-Trip                                                                   | 14.1                  | A - O                         | Yes                               | Yes                                        |
| S5      | F   | MinION   | E                                      | Chr4q25<br>Dup-Trip-Dup                                                                         | 15.4                  | A - G                         | Yes                               | Yes                                        |
| S6      | M   | MinION   | J, K                                   | Chr6q16.1 del<br>Chr6;22<br>Translocation                                                       | 16.9                  | A - K                         | Yes                               | Yes                                        |
| S7      | M   | MinION   | L                                      | Chr17;19<br>Translocation                                                                       | 18.3                  | A - K                         | N/A                               | Chr 17: Yes                                |
| S8      | F   | MinION   | M, N, O                                | Unbalanced<br>Chr4;9<br>Translocation<br>Chr4 qterdel<br>Chr9 pterdup<br>Chr16p11.2<br>Deletion | 15.1                  | A - O                         | Yes                               | Translocation:<br>Yes<br>Deletion: No      |
| B1 (S3) | M   | P2S      | C                                      | Chr16p13.3<br>Trip-Quint-Trip                                                                   | 8.4                   | A - J, L - N                  | Yes                               | Yes                                        |
| B2 (S1) | F   | P2S      | A                                      | chrXp21.1<br>Dup-Nml-Dup                                                                        | 9.7                   | A - J, L - N                  | Yes                               | Yes                                        |
| B3 (S2) | M   | P2S      | B                                      | Chr14q11.2<br>Dup-Nml-Dup                                                                       | 9.0                   | A - J, L - N                  | Yes                               | Yes                                        |
| B4 (S8) | F   | P2S      | M, N, O                                | Unbalanced<br>Chr4;9<br>Translocation<br>Chr4 qterdel<br>Chr9 pterdup<br>Chr16p11.2 del         | 10.1                  | A - J, L - N                  | Yes                               | Translocation:<br>Yes<br>Deletion: No      |

P2S – PromethION 2 Solo, Dup – duplication, Trip – Triplication, Quint – Quintuplication, Nml – normal copy number,

**Supplementary Table 2**

| Sample | Target Regions | File name in EGA                                                                |
|--------|----------------|---------------------------------------------------------------------------------|
| S1     | A - G          | 20230717_1631_MN23293_FAX31524_8f551f59                                         |
| S2     | A - L          | 20231009_1431_MN23293_FAX56944_cbd8020b                                         |
| S3     | A - G          | 20230712_1543_MN23293_FAX32391_3d6b7754_20230710_1521_MN23293_FAX32391_27ca4d51 |
| S4     | A - O          | 20231023_1507_MN22993_FAX54901_9bd2d7d5_20231026_1022_MN22993_FAX54901_7d924418 |
| S5     | A - G          | 20230704_1535_MN23293_FAX20347_fd6867ed                                         |
| S6     | A - K          | 20230907_1404_MN22993_FAX54893_2fadf810                                         |
| S7     | A - K          | 20230919_1517_MN23293_FAX55036_c0969d5f                                         |
| S8     | A - O          | 20231026_1022_MN23293_FAX54949_91eb1ca2_20231023_1507_MN23293_FAX54949_2dfa3987 |
| B1     | A - J, L - N   | p2_solo.barcode01                                                               |
| B2     | A - J, L - N   | p2_solo.barcode02                                                               |
| B3     | A - J, L - N   | p2_solo.barcode03                                                               |
| B4     | A - J, L - N   | p2_solo.barcode04                                                               |

Table showing sample, target regions and the corresponding file name for files uploaded to EGA.

Supplementary Figures

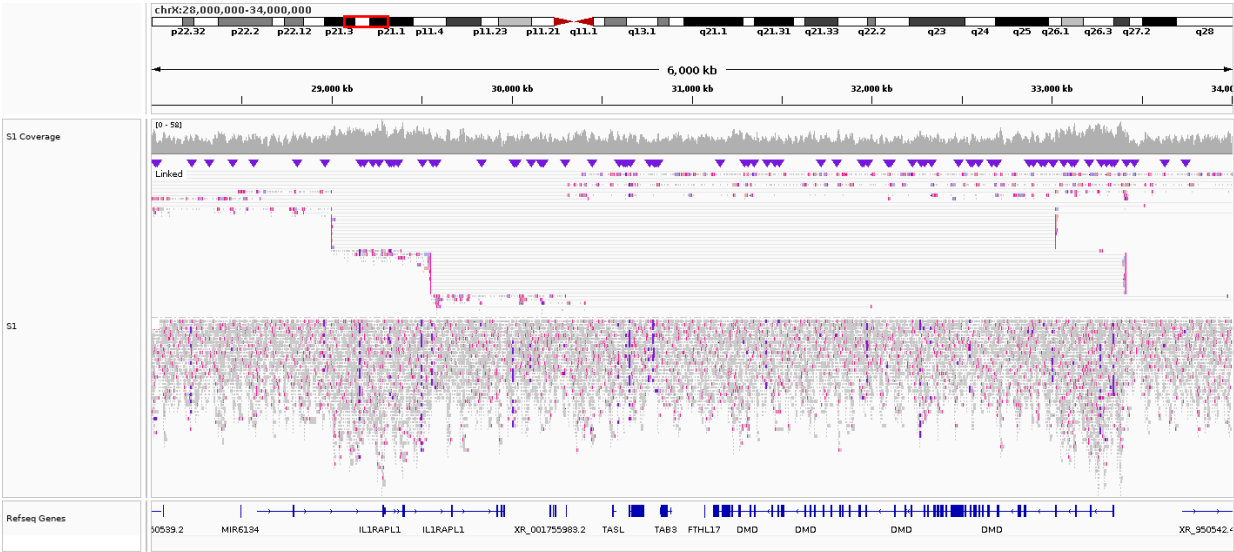

**Figure S1a.** Overview of highlighted rearrangement involving *IL1RAPL1* & *DMD* (Target region A) in sample S1 sequenced on MinION (same as sample B2 sequenced on P2S).

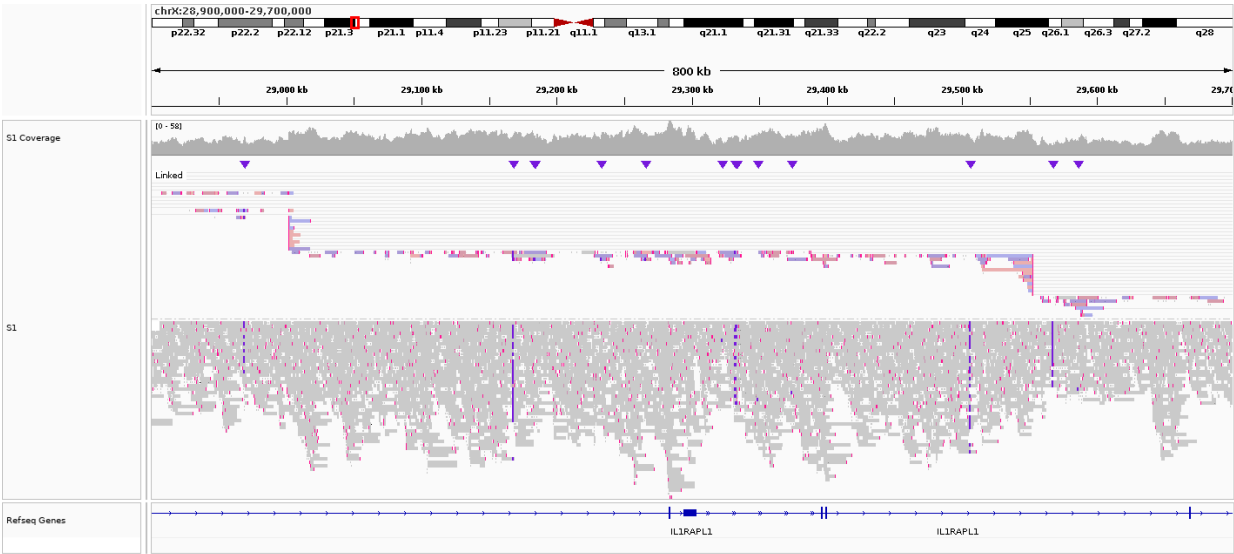

**Figure S1b.** Left breakpoint of highlighted rearrangement involving *IL1RAPL1* & *DMD* (Target region A) in sample S1 sequenced on MinION (same as sample B2 sequenced on P2S).

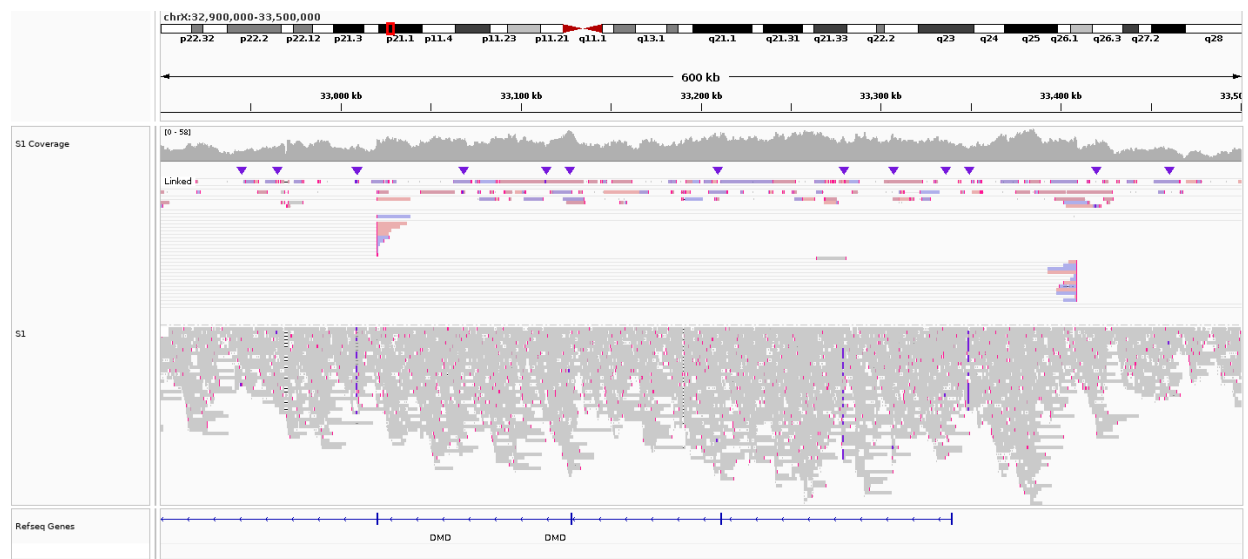

**Figure S1c.** Right breakpoint of highlighted rearrangement involving *IL1RAPL1* & *DMD* (Target region A) in sample S1 sequenced on MinION (same as sample B2 sequenced on P2S).

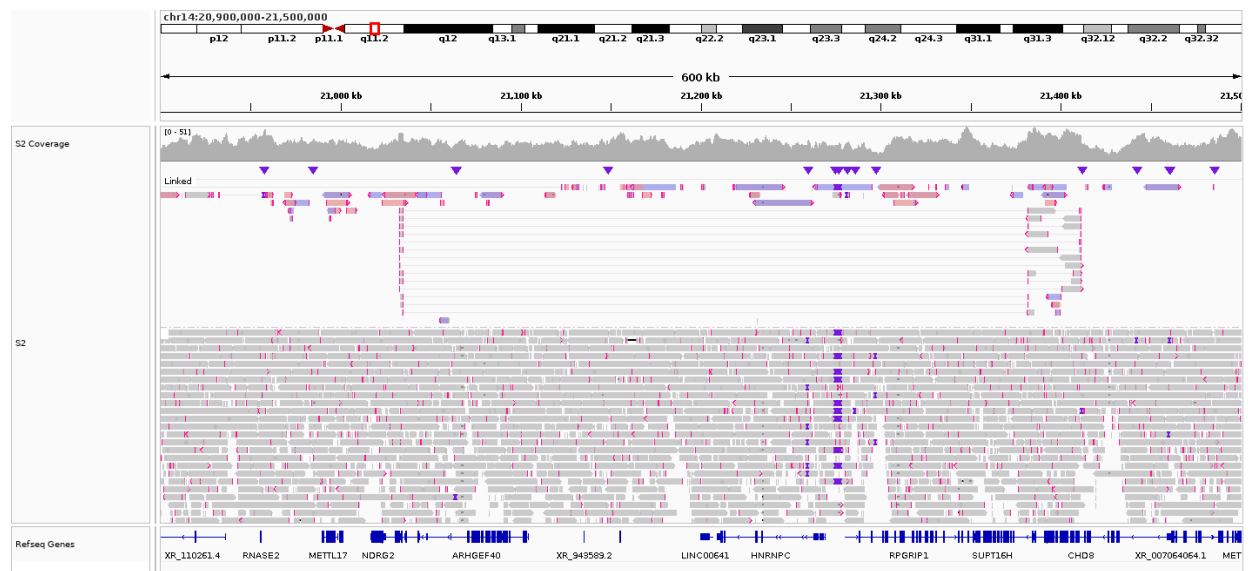

**Figure S2a.** Overview of highlighted rearrangement involving *CHD8* (Target region B) in sample S2 sequenced on MinION (same as sample B3 sequenced on P2S).

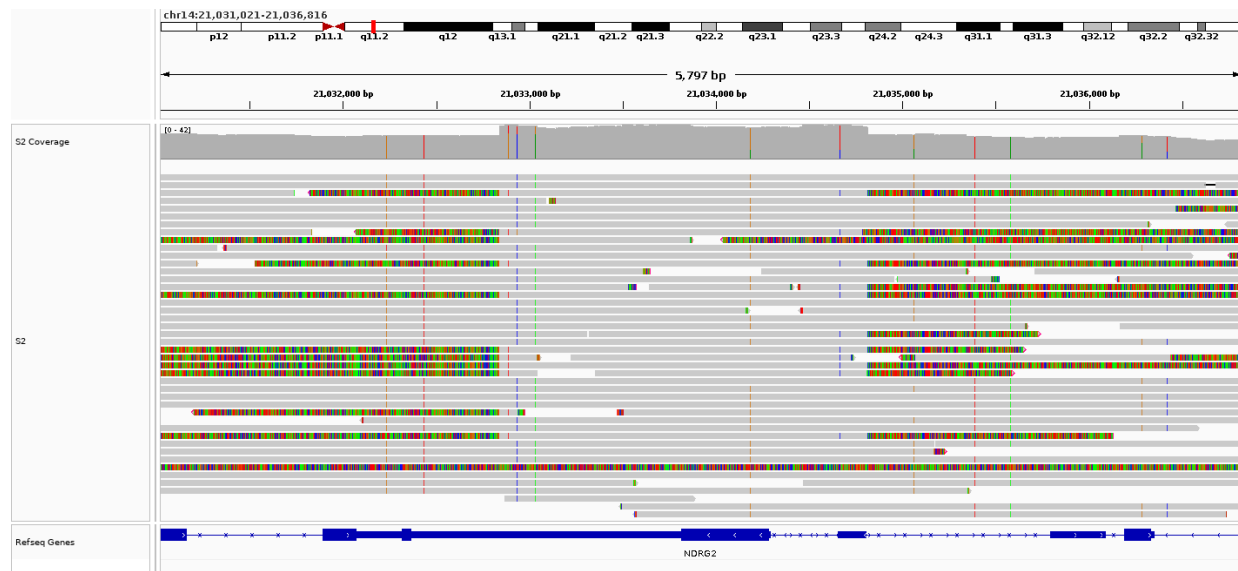

**Figure S2b.** Left breakpoint of highlighted rearrangement involving *CHD8* (Target region B) in sample S2 sequenced on MinION (same as sample B3 sequenced on P2S).

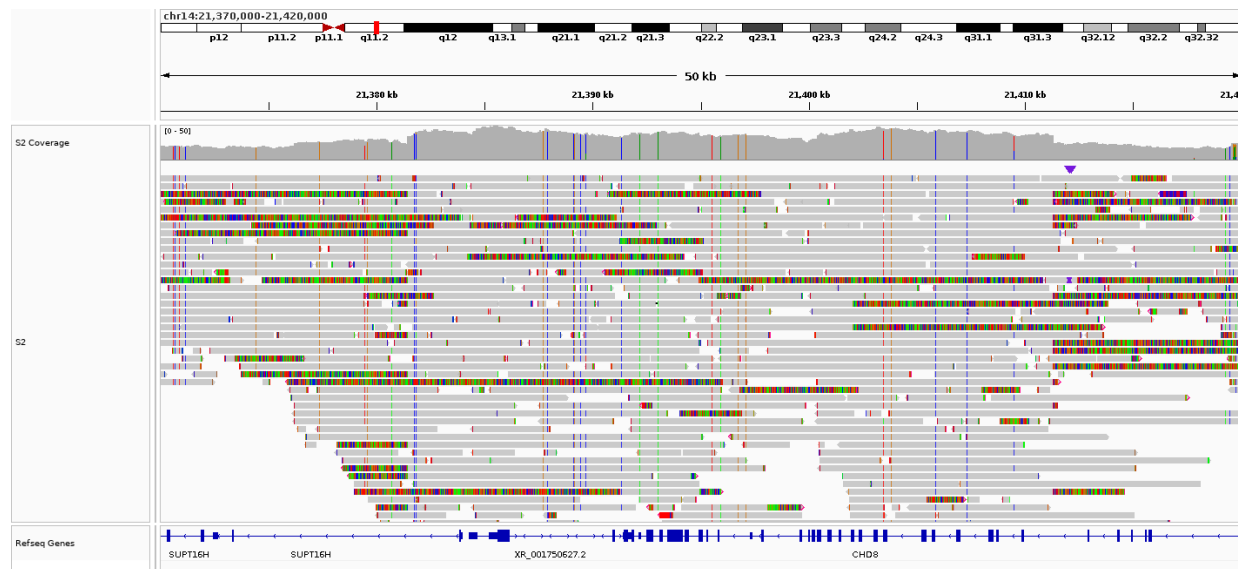

**Figure S2c.** Right breakpoint of highlighted rearrangement involving *CHD8* (Target region B) in sample S2 sequenced on MinION (same as sample B3 sequenced on P2S).

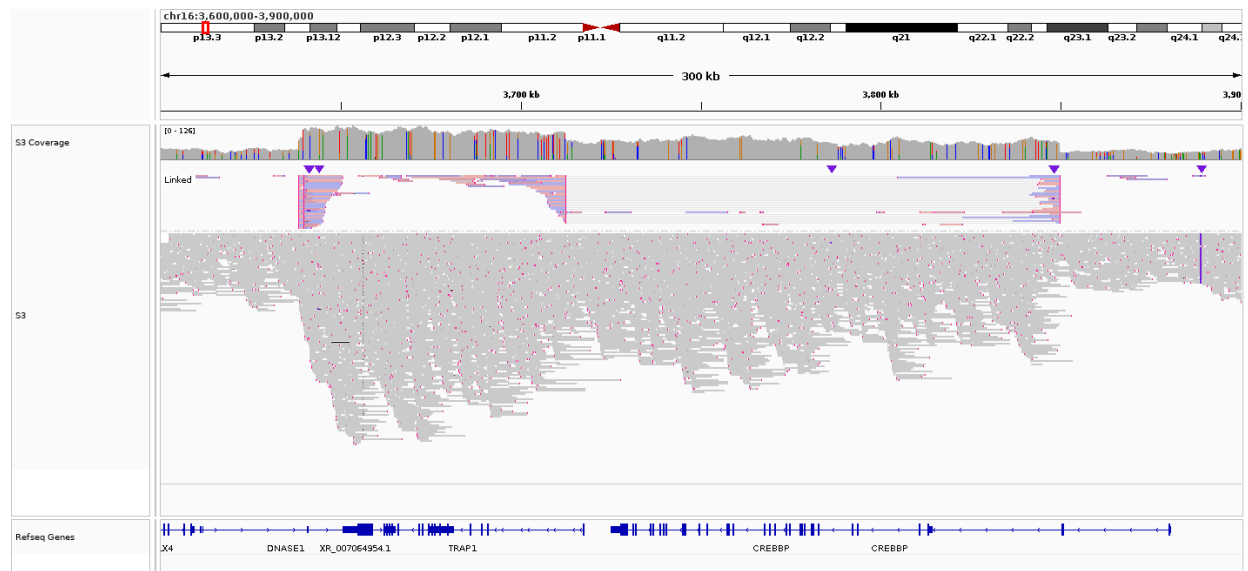

**Figure S3a.** Overview of highlighted rearrangement involving *CREBBP* (Target region C) in sample S3 (Father) sequenced on MinION (same as sample B3 sequenced on P2S).

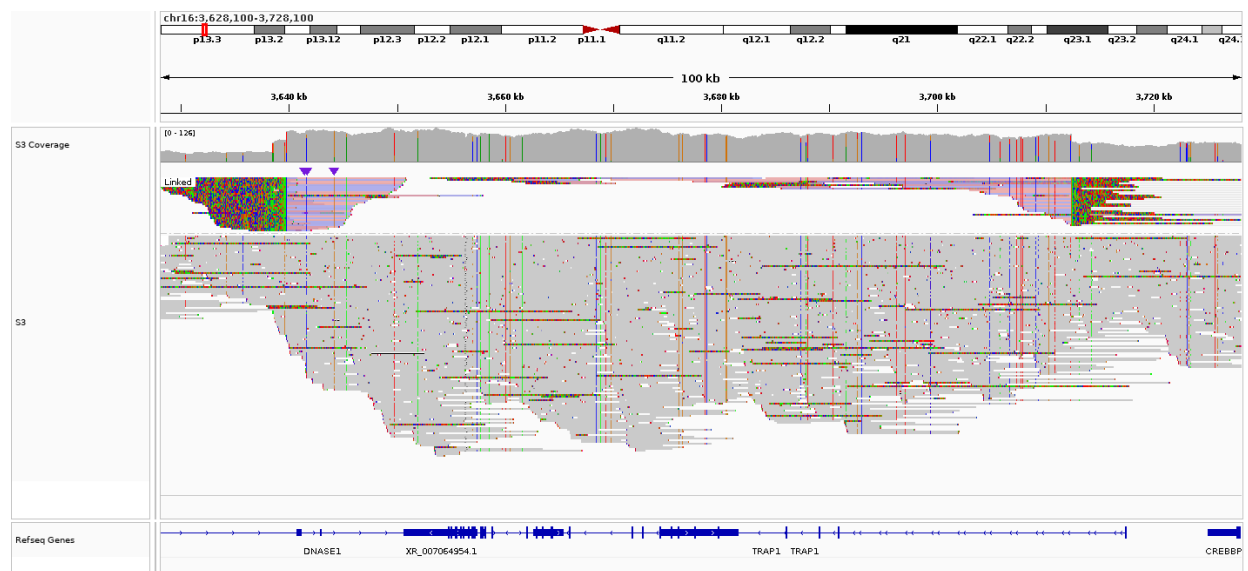

**Figure S3b.** Left breakpoint of highlighted rearrangement involving *CREBBP* (Target region C) in sample S3 (Father) sequenced on MinION (same as sample B3 sequenced on P2S).

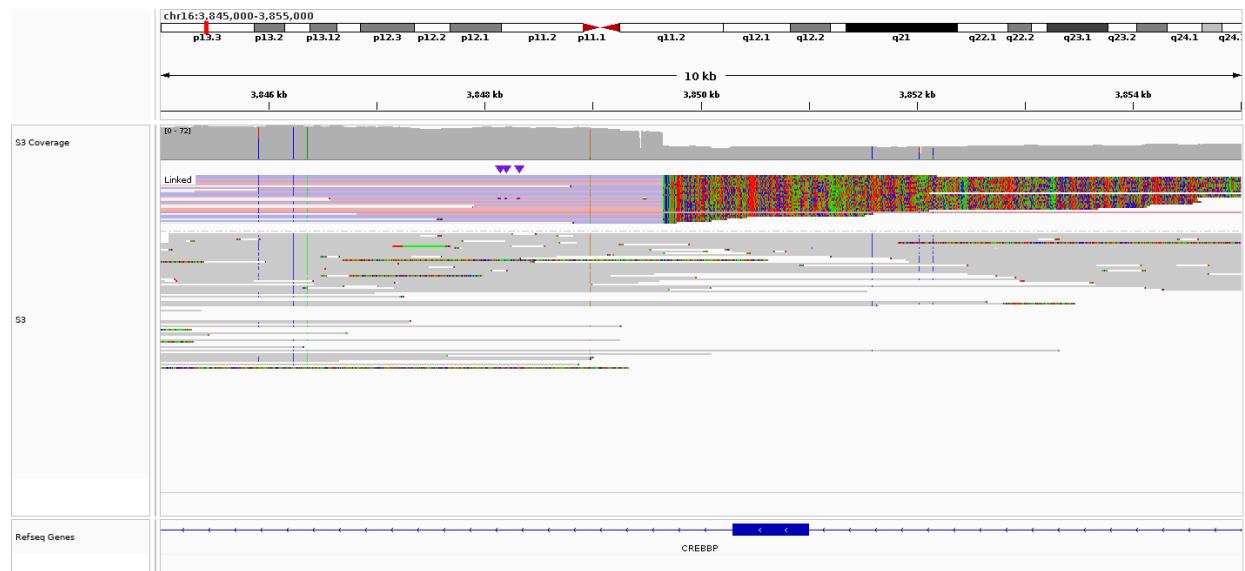

**Figure S3c.** Right breakpoint of highlighted rearrangement involving *CREBBP* (Target region C) in sample S3 (Father) sequenced on MinION (same as sample B3 sequenced on P2S).

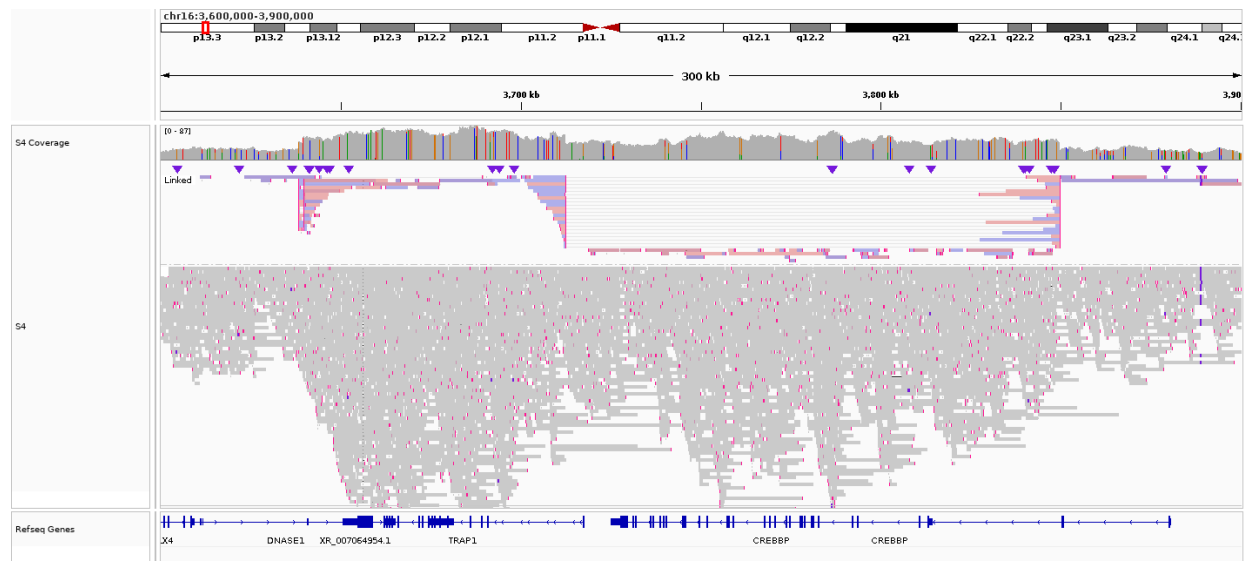

**Figure S4a.** Overview of highlighted rearrangement involving *CREBBP* (Target region C) in sample S4 (Proband) sequenced on MinION.

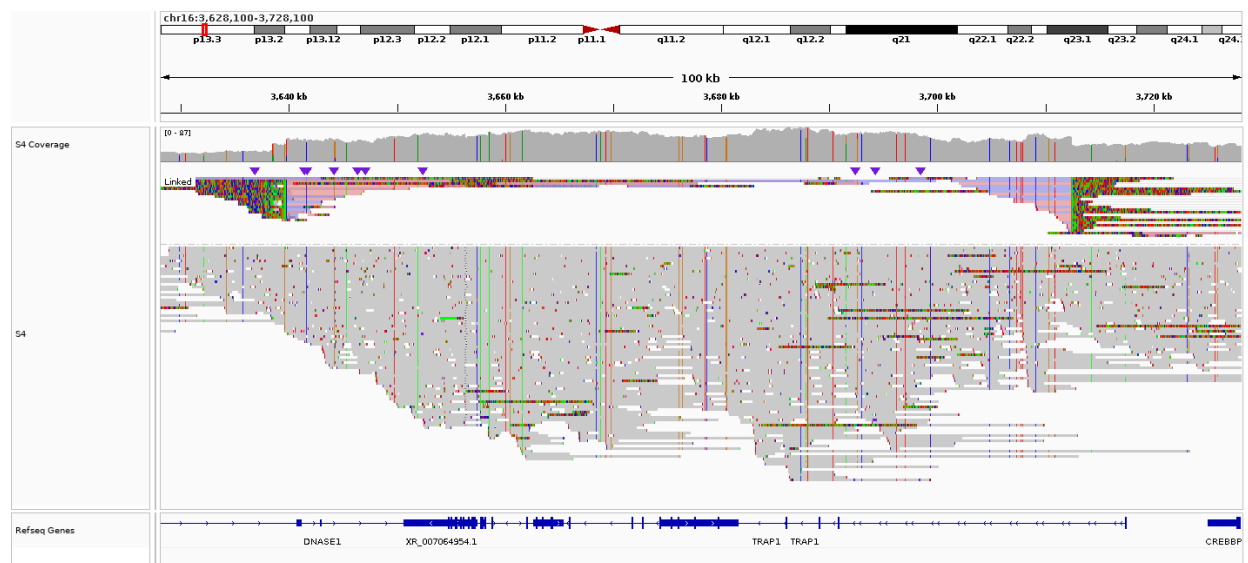

**Figure S4b.** Left breakpoint of highlighted rearrangement involving *CREBBP* (Target region C) in sample S4 (Proband) sequenced on MinION.

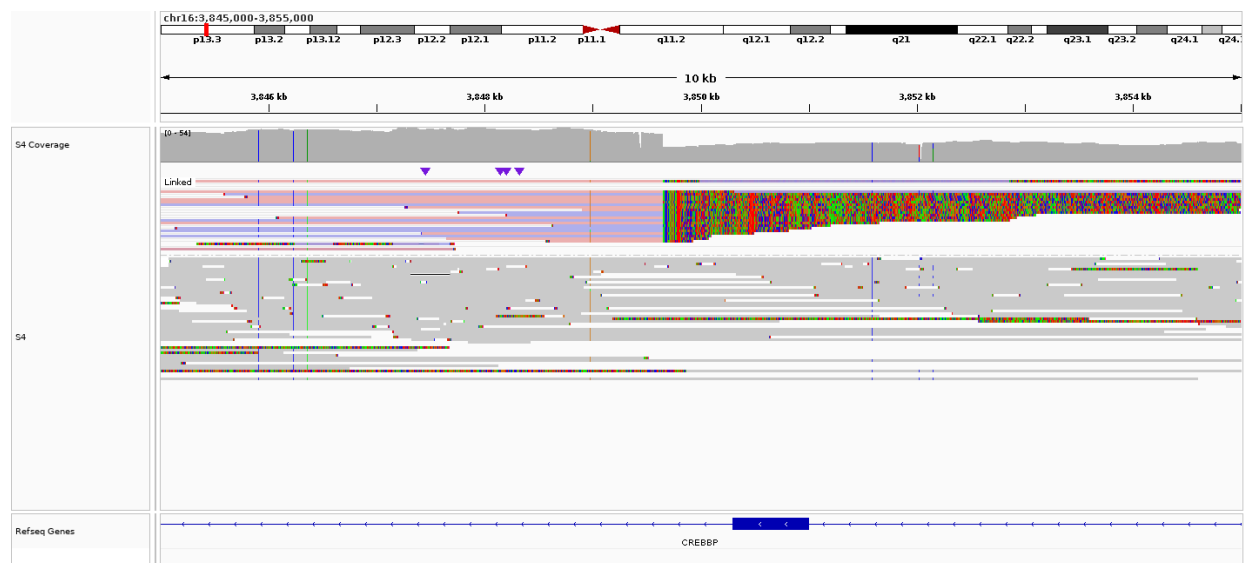

**Figure S4c.** Right breakpoint of highlighted rearrangement involving *CREBBP* (Target region C) in sample S4 (Proband) sequenced on MinION.



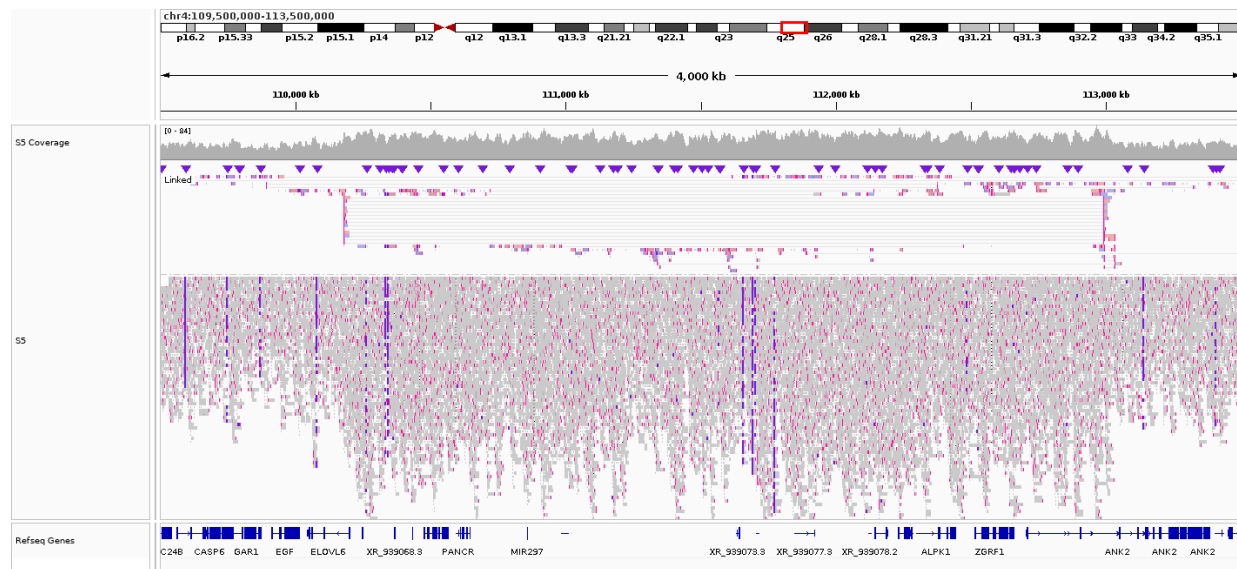

**Figure S5a.** Overview of highlighted rearrangement involving *ANK2* (Target region E) in sample S5 sequenced on MinION.

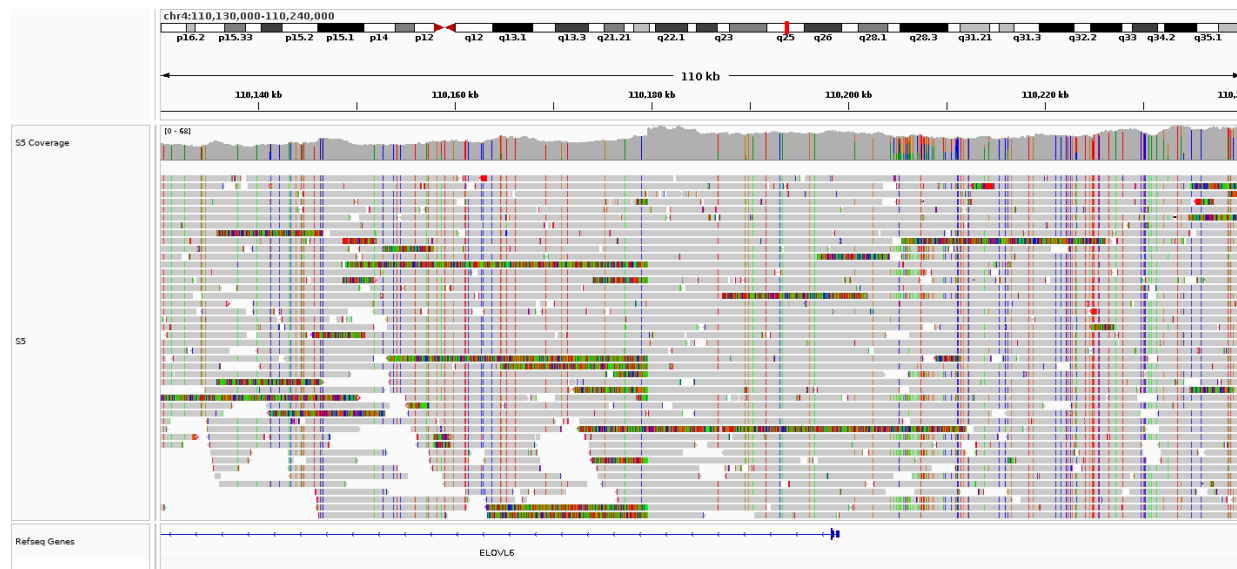

**Figure S5b.** Left breakpoint of highlighted rearrangement involving *ANK2* (Target region E) in sample S5 sequenced on MinION.

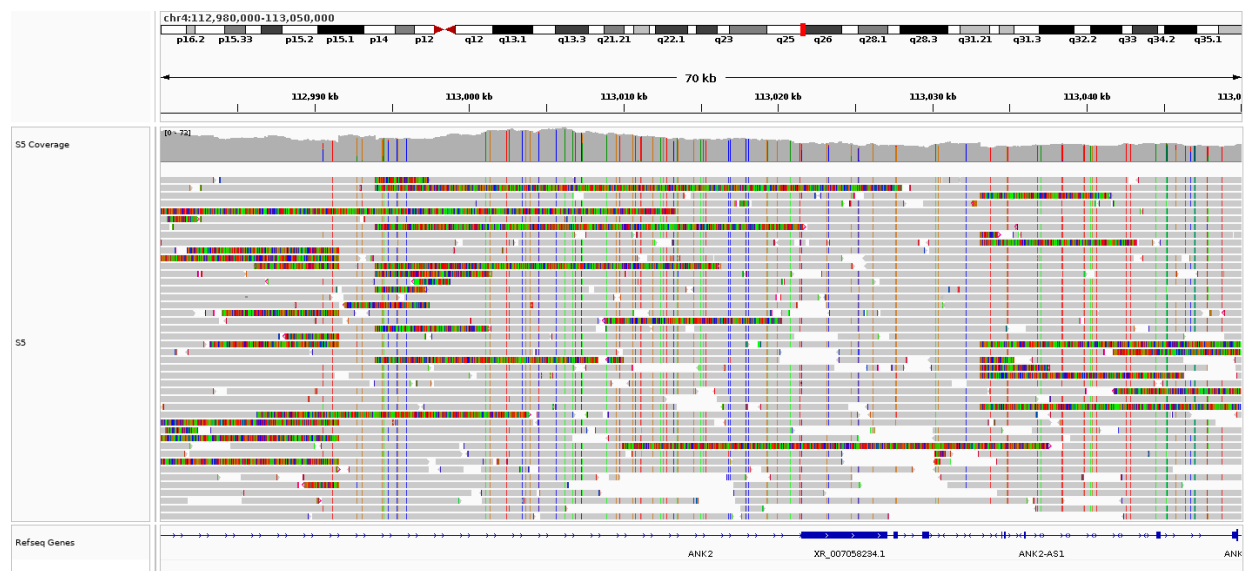

**Figure S5c.** Right breakpoints of highlighted rearrangement involving *ANK2* (Target region E) in sample S5 sequenced on MinION.

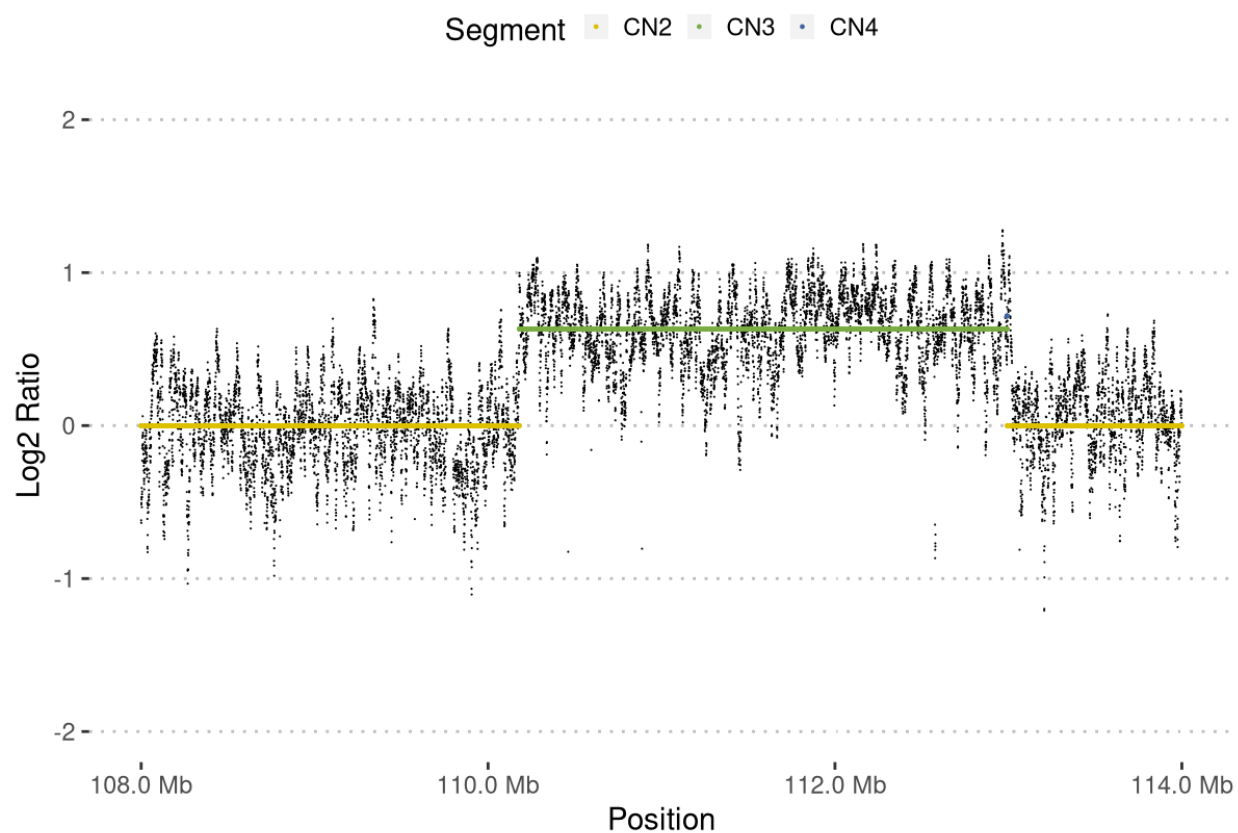

**Figure S5d.** Coverage plot of highlighted rearrangement involving *ANK2* (Target region E) in sample S5 sequenced on MinION.

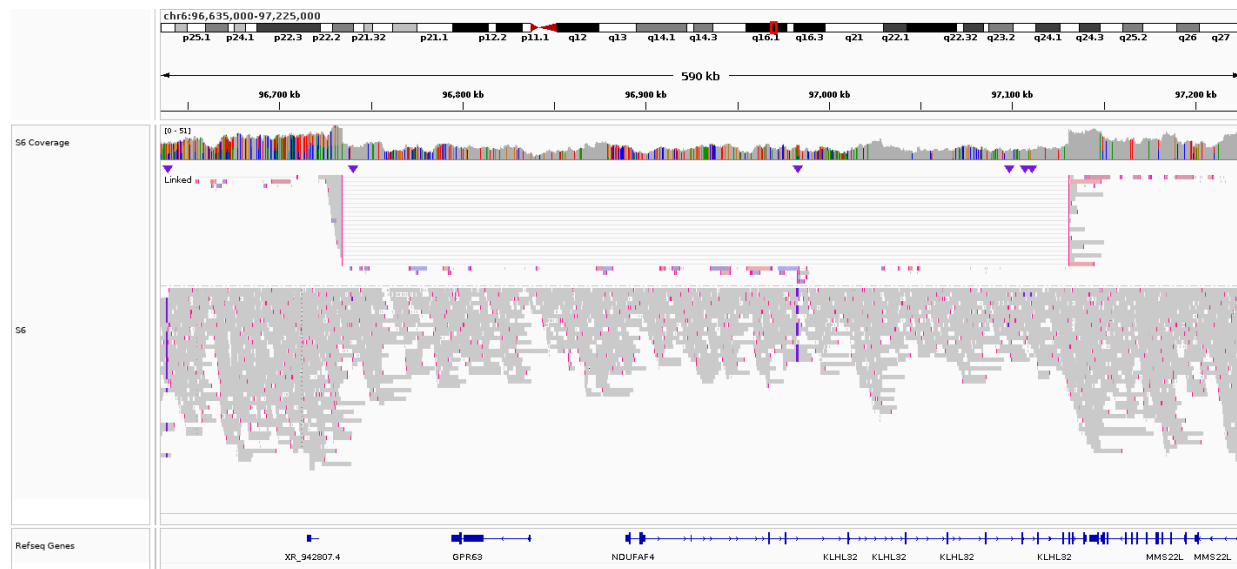

**Figure S6a.** Overview of highlighted rearrangement involving a deletion (Target region J) in sample S6 sequenced on MinION.

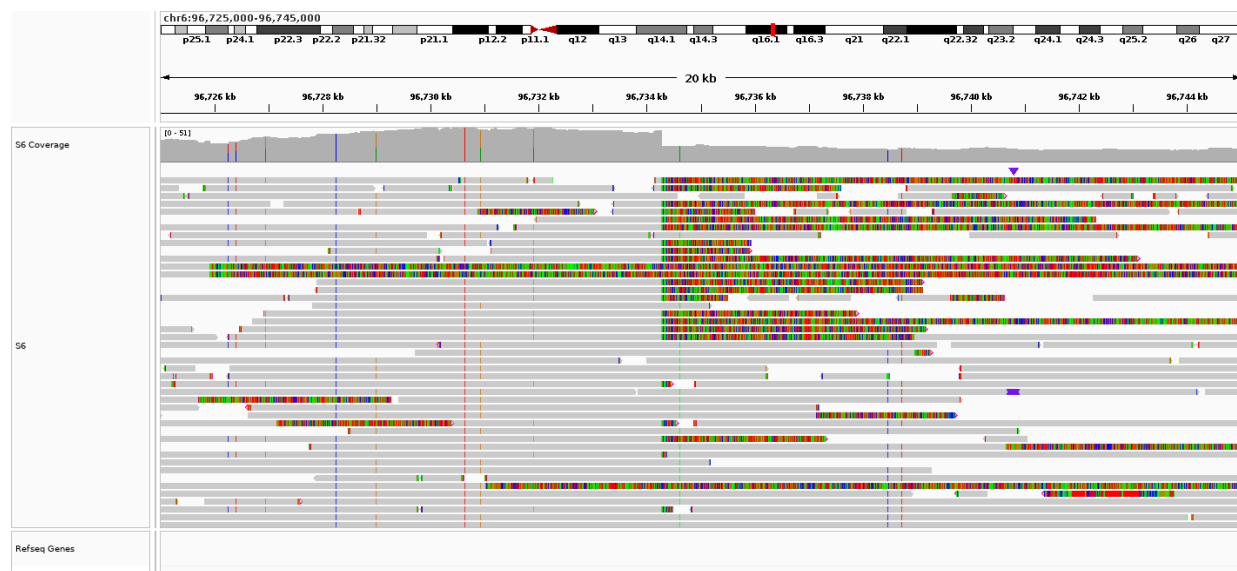

**Figure S6b.** Left breakpoint of highlighted rearrangement involving a deletion (Target region J) in sample S6 sequenced on MinION.

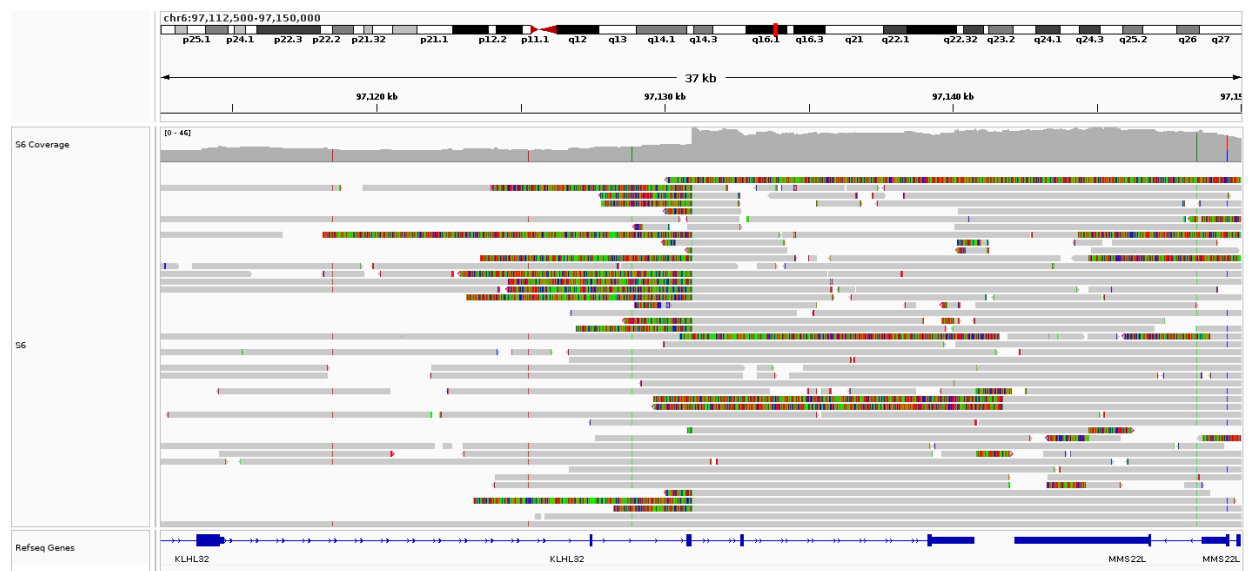

**Figure S6c.** Right breakpoint of highlighted rearrangement involving a deletion (Target region J) in sample S6 sequenced on MinION.

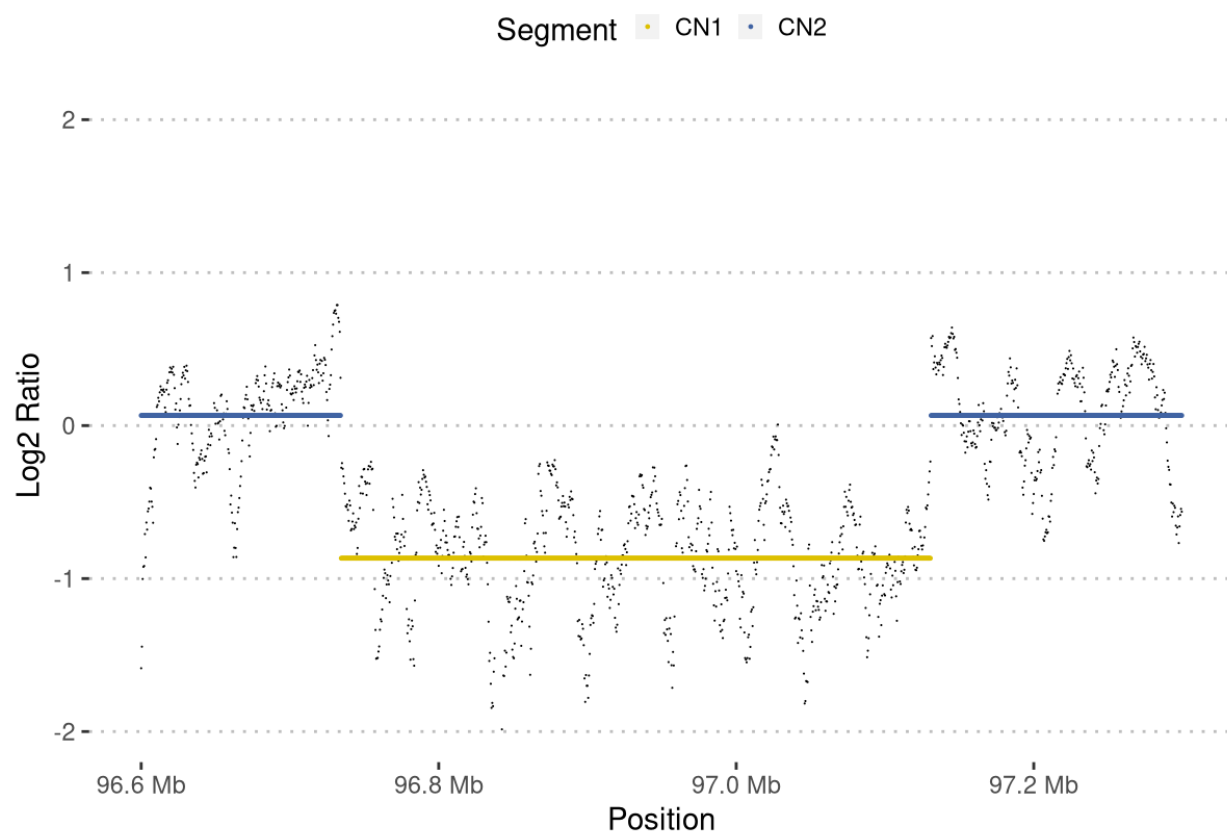

**Figure S6d.** Coverage plot of highlighted rearrangement involving a deletion (Target region J) in sample S6 sequenced on MinION.

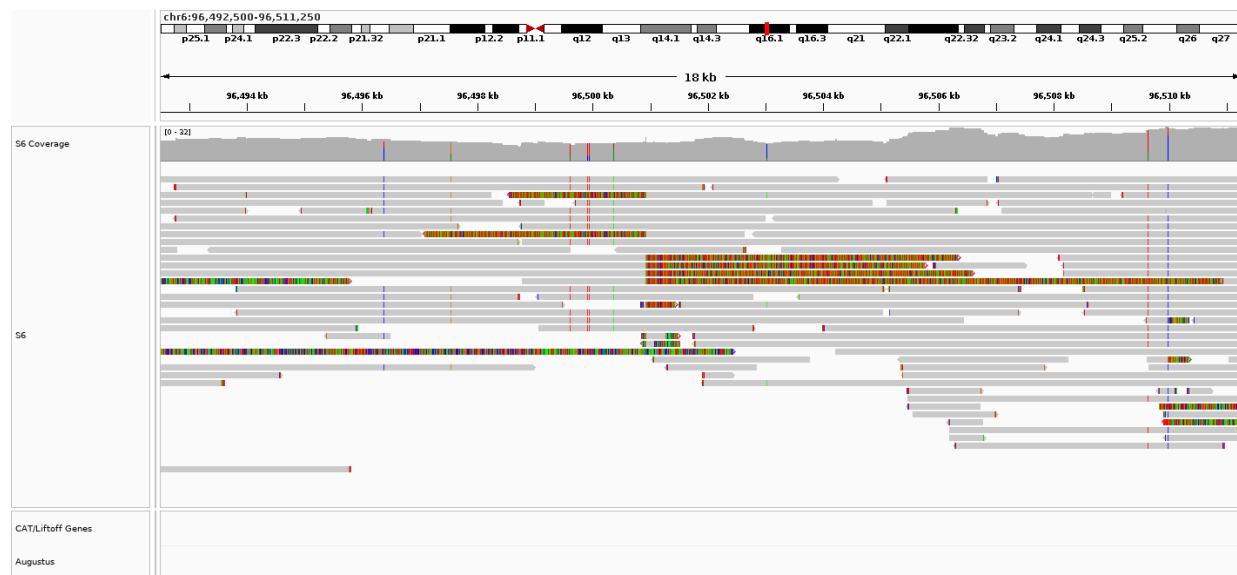

**Figure S6e.** Overview of highlighted rearrangement involving a translocation (Target region K) in sample S6 sequenced on MinION.

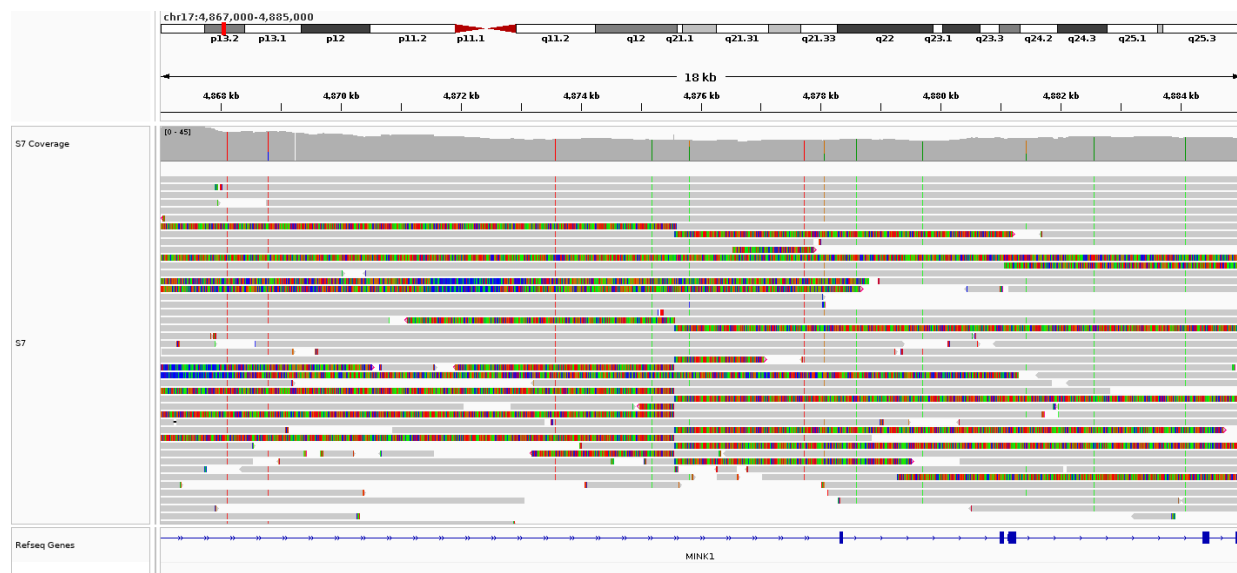

**Figure S7a.** Overview of highlighted rearrangement involving a translocation (Target region L) in sample S7 sequenced on MinION.

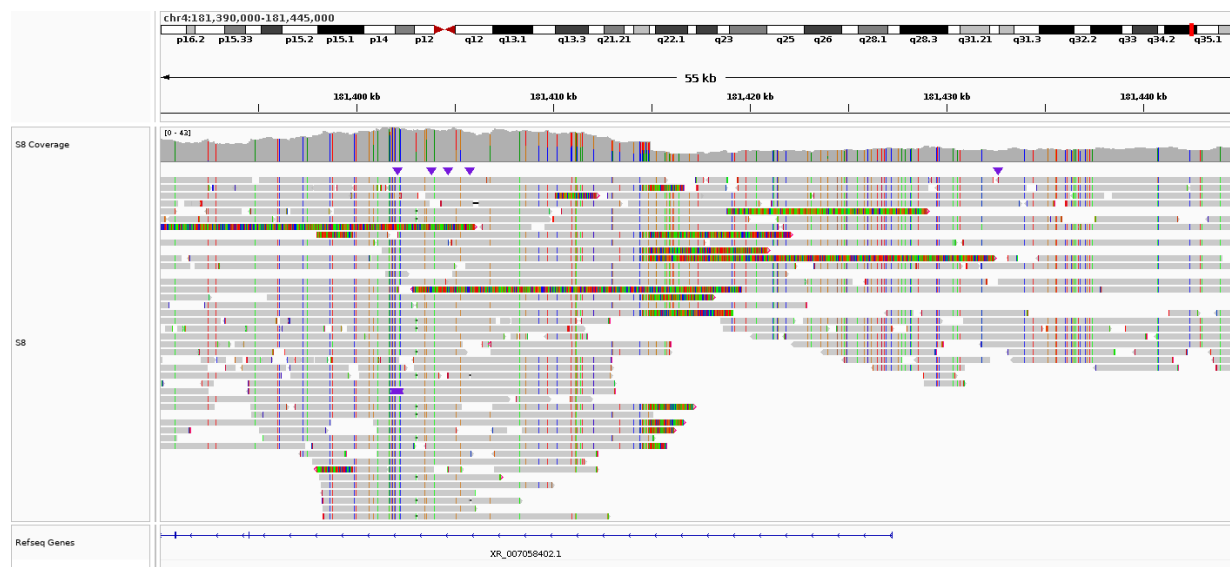

**Figure S8a.** Overview of highlighted rearrangement involving a translocation (Target region M) in sample S8 (same as B4) sequenced on MinION.

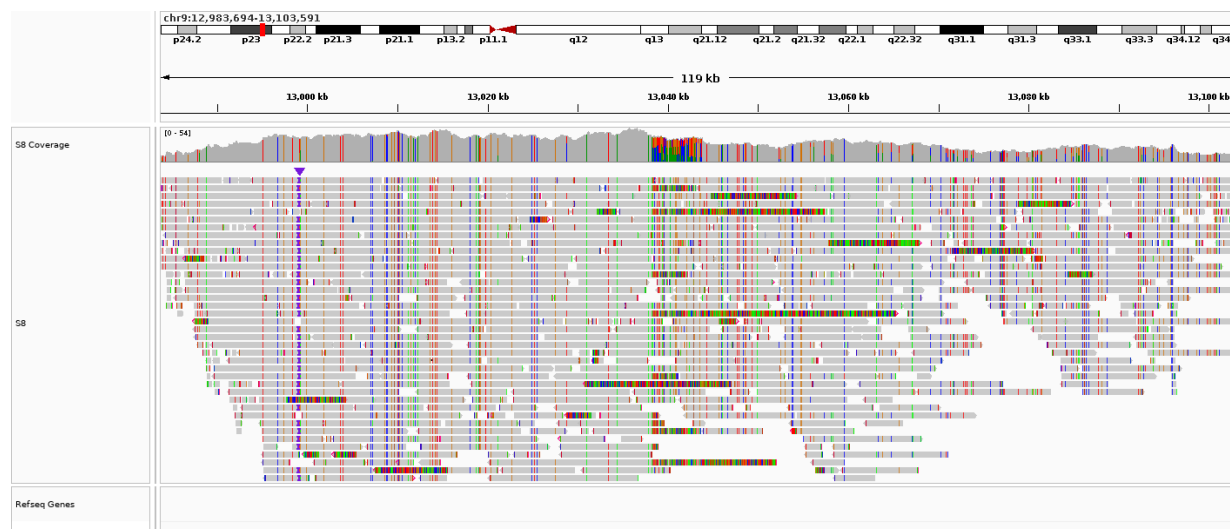

**Figure S8b.** Overview of highlighted rearrangement involving a translocation (Target region N) in sample S8 (same as B4) sequenced on MinION.

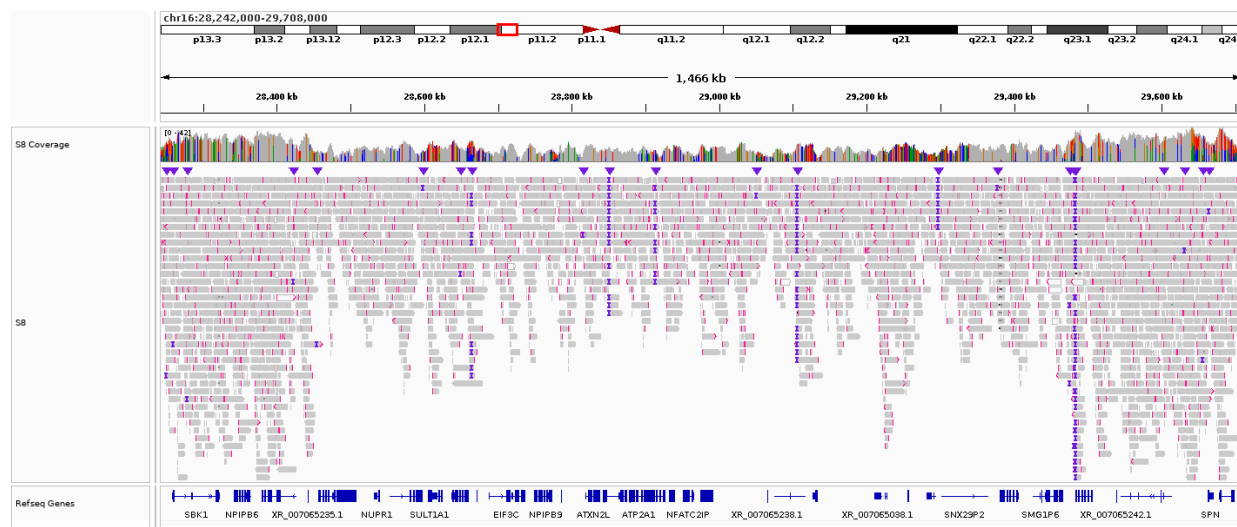

**Figure S8c.** Overview of highlighted rearrangement involving a deletion (Target region O) in sample S8 (same as B4) sequenced on MinION.

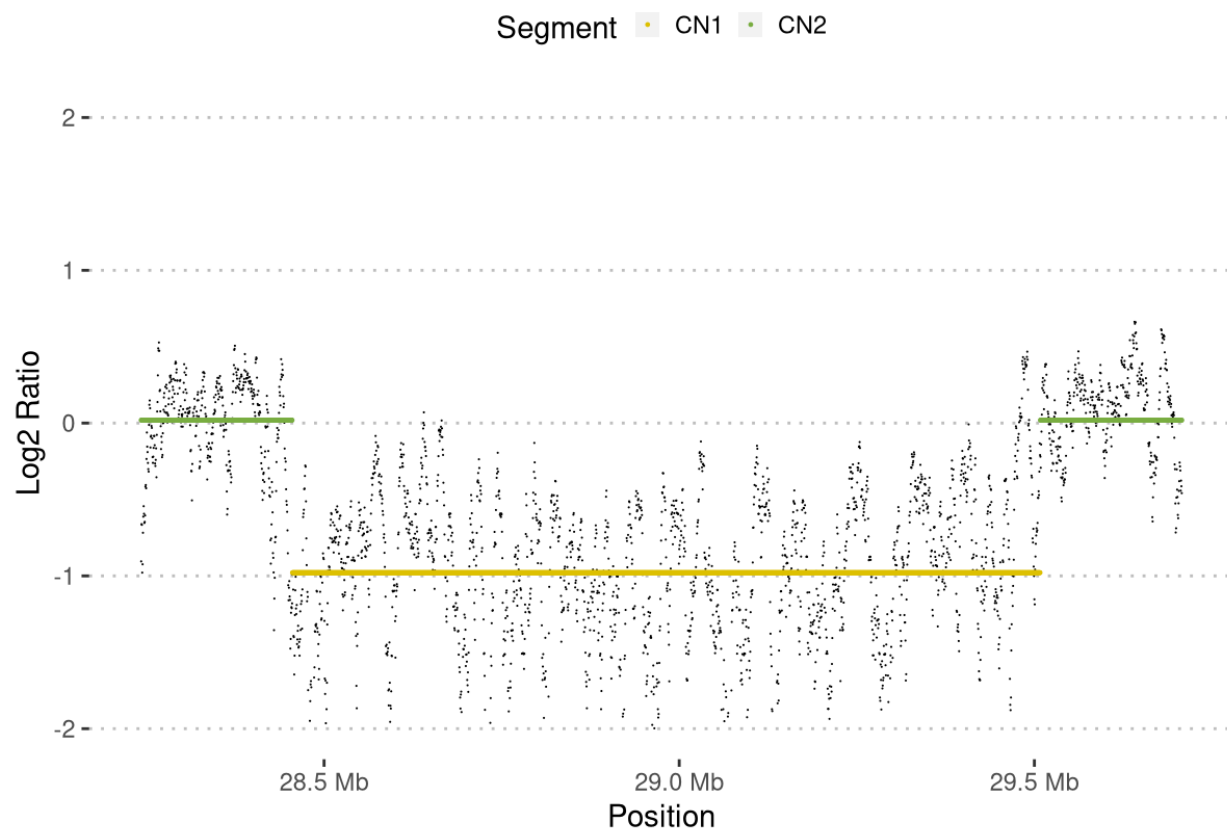

**Figure S8d.** Coverage plot of highlighted rearrangement involving a deletion (Target region O) in sample S8 (same as B4) sequenced on MinION.
